# Supplementary material for: Multiplexed and high-throughput neuronal fluorescence imaging with diffusible probes
Source: PubMed Central journal article supplement (PMC6763432; doi:10.1038/s41467-019-12372-6), 2019-09-26
Supplement: 41467_2019_12372_MOESM3_ESM.pdf [file 41467_2019_12372_MOESM3_ESM.pdf]

## **Description of Additional Supplementary Files**

File Name: Supplementary Data 1

Description: Detailed information on all statistical tests performed for Fig 5b,c and Supplementary Figure 20.

File Name: Supplementary Data 2

Description: Detailed information on all statistical tests performed for Supplementary Figure 21.

File Name: Supplementary Software 1

Description: Zip file containing MATLAB and python scripts to process and analyze PRISM images. Software is also available for download at: [https://github.com/lcbb/PRISM\\_analysis](https://github.com/lcbb/PRISM_analysis)
